# Supplementary material for: Genetic correlations and genome-wide associations of cortical structure in general population samples of 22,824 adults
Source: PubMed Central journal article supplement (PMC7508833; doi:10.1038/s41467-020-18367-y), 2020-09-22
Supplement: 41467_2020_18367_MOESM3_ESM.pdf [file 41467_2020_18367_MOESM3_ESM.pdf]

## Descriptions of Additional Supplementary Files

### Supplementary Data 1

**Description:** Genome-wide significant associations ( $p_{\text{Discovery}} < 1.09 \times 10^{-9}$ ) of the global cortex.

### Supplementary Data 2

**Description:** Genome-wide significant associations ( $p_{\text{Discovery}} < 1.09 \times 10^{-9}$ ) of regional cortical thickness.

### Supplementary Data 3

**Description:** Genome-wide significant associations ( $p_{\text{Discovery}} < 1.09 \times 10^{-9}$ ) of regional cortical surface area.

### Supplementary Data 4

**Description:** Genome-wide significant associations ( $p_{\text{Discovery}} < 1.09 \times 10^{-9}$ ) of regional cortical volume.

### Supplementary Data 5

**Description:** Genomic control  $\lambda_{GC}$ , LDSR intercept and LDSR ratio.

### Supplementary Data 6

**Description:** Genome-wide significant associations ( $p_{\text{Discovery}} < 1.09 \times 10^{-9}$ ) of surface area and volume in different cortical regions.

### Supplementary Data 7

**Description:** Genome-wide significant associations ( $p_{\text{Discovery}} < 1.09 \times 10^{-9}$ ) within the same cortical region.

### Supplementary Data 8

**Description:** Genome-wide significant associations ( $p_{\text{Discovery}} < 1.09 \times 10^{-9}$ ) of cortical thickness, surface area and volume and corresponding UKBB p-values from Elliott, L.T. et al. 2018 and Zhao, B. et al. 2019.

### Supplementary Data 9

**Description:** Polygenic risk score (PRS) prediction in 7800 out-of-sample individuals from the UK Biobank.

### Supplementary Data 10

**Description:** GWAScatalog (as implemented in FUMA) results for lead SNPs ( $P_{\text{Discovery}} < 1.09 \times 10^{-9}$ ) - cortical thickness.

**Supplementary Data 11**

**Description:** GWAScatalog (as implemented in FUMA) results for lead SNPs ( $P_{\text{Discovery}} < 1.09 \times 10^{-9}$ ) - cortical surface area.

**Supplementary Data 12**

**Description:** GWAScatalog (as implemented in FUMA) results for lead SNPs ( $P_{\text{Discovery}} < 1.09 \times 10^{-9}$ ) - cortical volume.

**Supplementary Data 13**

**Description:** Annotation of genes mapped to independent lead SNPs - cortical thickness.

**Supplementary Data 14**

**Description:** Annotation of genes mapped to independent lead SNPs - cortical surface area.

**Supplementary Data 15**

**Description:** Annotation of genes mapped to independent lead SNPs - cortical volume.

**Supplementary Data 16**

**Description:** MAGMA gene-based analyses (as implemented in FUMA) – cortical thickness.

**Supplementary Data 17**

**Description:** MAGMA gene-based analyses (as implemented in FUMA) - cortical surface area.

**Supplementary Data 18**

**Description:** MAGMA gene-based analyses (as implemented in FUMA) - cortical volume.

**Supplementary Data 19**

**Description:** Association between lead SNPs of cortical thickness, surface area and volume ( $p_{\text{Discovery}} < 1.09 \times 10^{-9}$ ) and expression QTL in autopsied brains from the ROSMAP sample.

**Supplementary Data 20**

**Description:** MAGMA gene-set analyses (as implemented in FUMA).

**Supplementary Data 21**

**Description:** Heritability estimates.

**Supplementary Data 22**

**Description:** Partitioned heritability - functional annotation.

**Supplementary Data 23**

**Description:** Partitioned heritability - cell-type-specific annotation.

**Supplementary Data 24**

**Description:** Genetic correlation between cortical thickness, surface area and volume within regions.

**Supplementary Data 25**

**Description:** Genetic correlation of cortical thickness between regions.

**Supplementary Data 26**

**Description:** Genetic correlation of surface area between regions.

**Supplementary Data 27**

**Description:** Genetic correlation of volume between regions.

**Supplementary Data 28**

**Description:** Genetic correlation between cortical thickness and other GWAS phenotypes.

**Supplementary Data 29**

**Description:** Genetic correlation between cortical surface area and other GWAS phenotypes.

**Supplementary Data 30**

**Description:** Genetic correlation between cortical volume and other GWAS phenotypes.

**Supplementary Data 31**

**Description:** Description of genes associated with global and regional cortical thickness, surface area and volume.

**Supplementary Data 32**

**Description:** Population characteristics.

**Supplementary Data 33**

**Description:** Genotyping, quality control, imputation and association.

**Supplementary Data 34**

**Description:** Image acquisition and processing.

**Supplementary Data 35**

**Description:** Descriptive statistics of cortical thickness (mm).

**Supplementary Data 36**

**Description:** Descriptive statistics of cortical surface area (mm<sup>2</sup>).

**Supplementary Data 37**

**Description:** Descriptive statistics of cortical volume (mm<sup>3</sup>).
